# Supplementary material for: Attachment Performance of Stick Insects (Phasmatodea) on Plant Leaves with Different Surface Characteristics
Source: MDPI journal article supplement (doi:10.3390/insects13100952), 2022-10-19
Supplement: s1 [file s1]

Supplementary Materials:

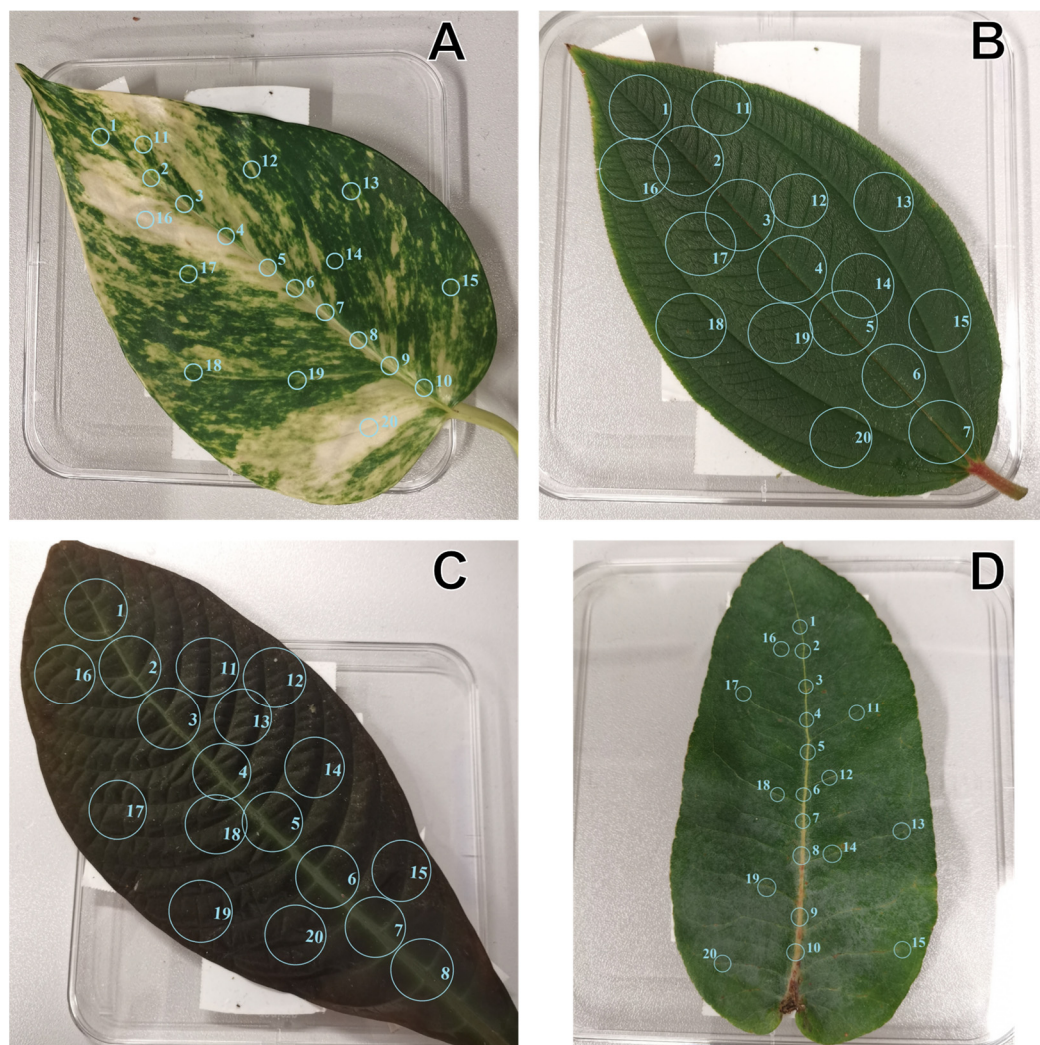

**Figure S1.** Localisation of the measurements for surface characterization. (A) *Ep. aureum*, (B) *T. urvilleana*, (C) *H. ghiesbreghtii*, (D) *Eu. globulus*.

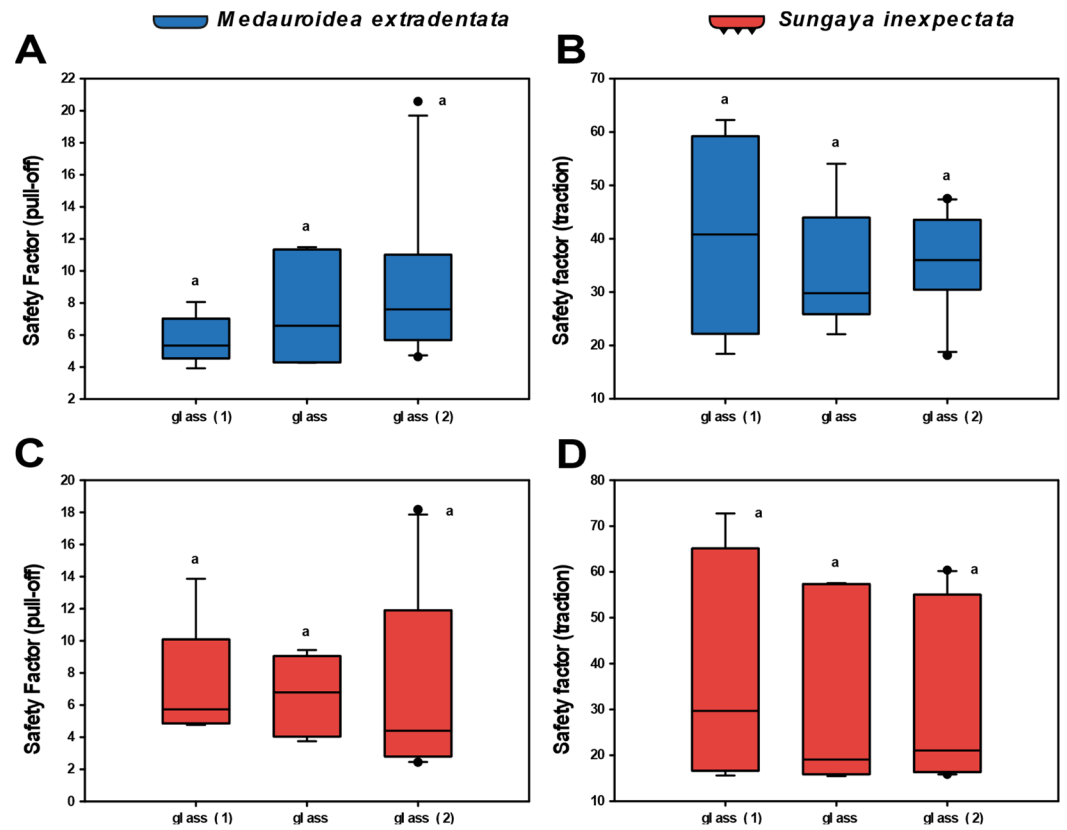

**Figure S2.** Contamination effect measurement with glass as control substrate. (A) Pull-off force measurement with *M. extradentata*. (B) Traction force measurement with *M. extradentata*. (C) Pull-off force measurement with *S. inexpectata*. (D) Traction force measurement with *S. inexpectata*. Statistically equal groups within a graph are marked with the same letter, tested through Kruskal-Wallis One Way ANOVA on Ranks (d.f. = 2,  $N_{\text{glass1,glass}} = 5$ ,  $N_{\text{glass2}} = 10$ ; A:  $H = 2.677$ ,  $P = 0.262$ ; B:  $H = 0.643$ ,  $P = 0.725$ ; C:  $H = 0.894$ ,  $P = 0.639$ ; D:  $H = 0.894$ ,  $P = 0.832$ ). The boxes indicate 25th and 75th percentiles, whiskers define the 10th and 90th percentiles and the line within the boxes represents the median. Outliers are shown as individual points.

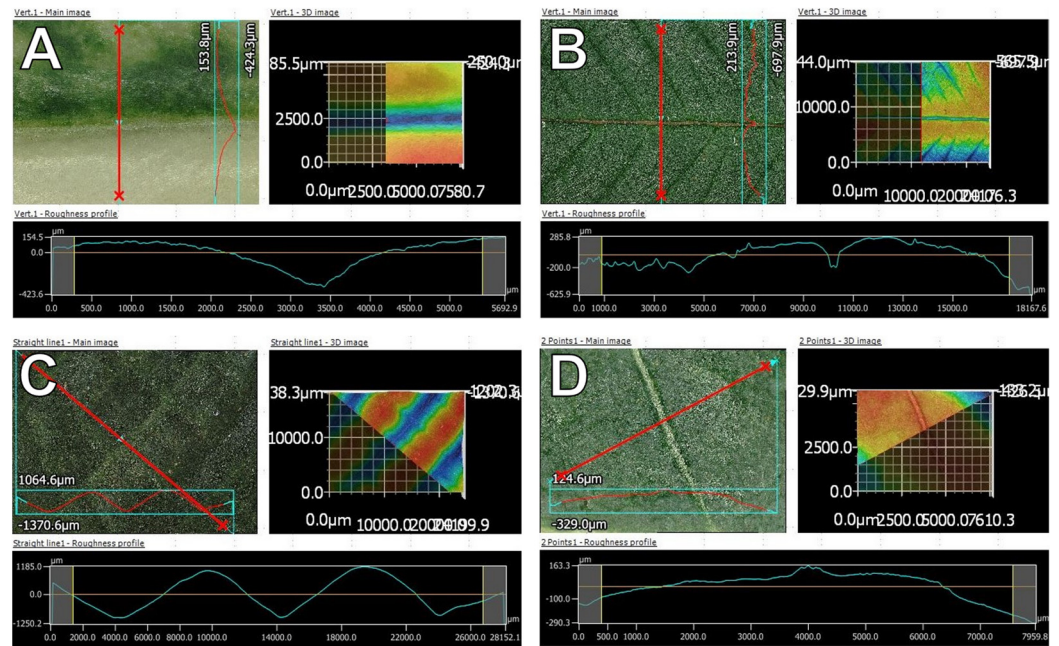

**Figure S3.** Exemplary 3D scanning images of the adaxial leaf surface with KEYENCE VR-300. In each composite figure the upper left picture is the scanned area, the upper right image is a topographic heat map of the scanned area and below is the roughness profile. (A) *Ep. aureum* area 4, (B) *T. urvilleana* area 3, (C) *H. ghiesbreghtii* area 17, (D) *Eu. globulus* area 12 (see Figure S1).

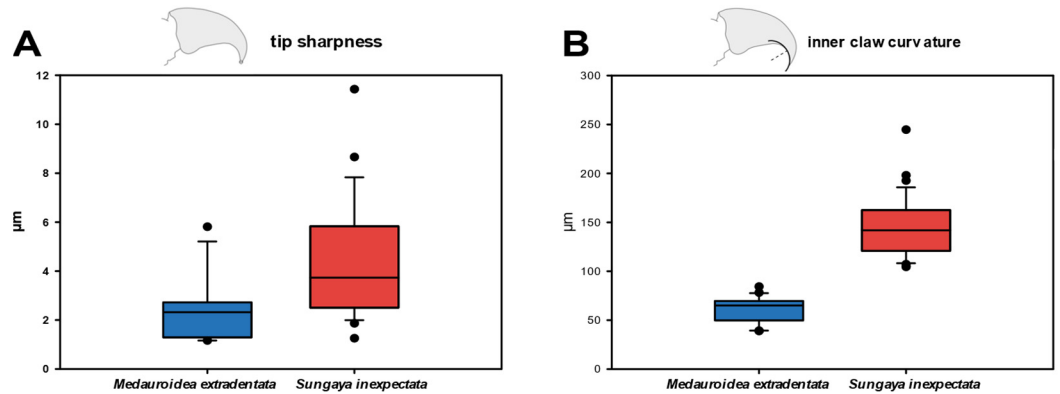

**Figure S4.** Tip sharpness (A) and inner curvature (B) of *M. extradentata* and *S. inexpectata*. The groups are all statistically different, tested through Mann-Whitney Rank Sum Test (A:  $N_{M.extradentata}=12$ ,  $N_{S.inexpectata}=25$ ,  $P=0.003$ ; B:  $N_{M.extradentata}=24$ ,  $N_{S.inexpectata}=35$ ,  $P>0.001$ ). The boxes indicate 25th and 75th percentiles, whiskers define the 10th and 90th percentiles and the line within the boxes represents the median. Outliers are shown as individual points.
